# Supplementary material for: The amyloid beta 42/38 ratio as a plasma biomarker of early memory deficits in cognitively unimpaired older adults
Source: PubMed Central journal article supplement (PMC11706698; doi:10.1016/j.neurobiolaging.2024.08.009), 2024-09-03
Supplement: NIHMS2041126-supplement-Supplement.pdf [file NIHMS2041126-supplement-Supplement.pdf]

**Suppl. Table 1. Partial Non-parametric correlations for plasma amyloid beta peptides and FBP separated by specific brain regions.**

|                   |                         | <b>A<math>\beta</math>38</b> | <b>A<math>\beta</math>40</b> | <b>A<math>\beta</math>42</b> | <b>A<math>\beta</math>42/A<math>\beta</math>40</b> | <b>A<math>\beta</math>42/A<math>\beta</math>38</b> |
|-------------------|-------------------------|------------------------------|------------------------------|------------------------------|----------------------------------------------------|----------------------------------------------------|
| FBP mean          | Correlation Coefficient | <b>-0.305</b>                | <b>-0.288</b>                | <b>-0.353</b>                | <b>-0.296</b>                                      | 0.267                                              |
|                   | P-value                 | <b>0.037</b>                 | <b>0.026</b>                 | <b>0.006</b>                 | <b>0.022</b>                                       | 0.07                                               |
| FBP frontal       | Correlation Coefficient | <b>-0.328</b>                | <b>-0.29</b>                 | <b>-0.346</b>                | <b>-0.296</b>                                      | 0.286                                              |
|                   | P-value                 | <b>0.025</b>                 | <b>0.025</b>                 | <b>0.007</b>                 | <b>0.022</b>                                       | 0.052                                              |
| FBP antcingulate  | Correlation Coefficient | <b>-0.306</b>                | <b>-0.317</b>                | <b>-0.345</b>                | <b>-0.272</b>                                      | 0.256                                              |
|                   | P-value                 | <b>0.037</b>                 | <b>0.014</b>                 | <b>0.007</b>                 | <b>0.036</b>                                       | 0.082                                              |
| FBP postcingulate | Correlation Coefficient | -0.279                       | <b>-0.256</b>                | <b>-0.279</b>                | -0.25                                              | 0.272                                              |
|                   | P-value                 | 0.058                        | <b>0.048</b>                 | <b>0.031</b>                 | 0.054                                              | 0.064                                              |
| FBP parietal      | Correlation Coefficient | -0.221                       | <b>-0.255</b>                | <b>-0.305</b>                | -0.237                                             | 0.194                                              |
|                   | P-value                 | 0.136                        | <b>0.049</b>                 | <b>0.018</b>                 | 0.068                                              | 0.19                                               |
| FBP temporal      | Correlation Coefficient | <b>-0.347</b>                | <b>-0.321</b>                | <b>-0.411</b>                | <b>-0.347</b>                                      | <b>0.294</b>                                       |
|                   | P-value                 | <b>0.017</b>                 | <b>0.012</b>                 | <b>0.001</b>                 | <b>0.007</b>                                       | <b>0.045</b>                                       |

18F-florbetapir (FBP) standardized uptake value ratio (SUVR). **The unadjusted p-values are significant at p<0.05. Bonferroni-adjusted p-values are significant at p<0.0083.**
